# Supplementary material
Source: PubMed Central journal article supplement (PMC4044848)
Supplement: supp_pp.114.235952_235952SupplementalData.pdf [file supp_pp.114.235952_235952SupplementalData.pdf]

Figure S1

```

Ch18_Williams      1  GGTTGGGGCTTGTGGCTCCAAGTATGAAGATGCCCGCATCTCTTCGATAAAGCCGCC
Chr18_Peking      1  .....C.....T.....
Chr11_Williams    1  .....C.....T.....
Truncated_alphaSNAP 1  .....C.....T.....
Chr11_Peking     1  .....C.....T.....

Ch18_Williams    61  AATTGCTTCAAGCTCGCCAAATCATGGGACAAGGCTGGAGCGACATACCTGAAGTTGGCA
Chr18_Peking     61  .....A.....
Chr11_Williams   61  .....A.....
Truncated_alphaSNAP 61  .....A.....
Chr11_Peking    61  .....A.....

Ch18_Williams    121 AGTTGTCATTTGAAGTTGGAAAGCAAGCATGAAGCTGCACAGGCCCATGTTCGATGCTGCA
Chr18_Peking     121 .....T.....
Chr11_Williams   121 .....T.....
Truncated_alphaSNAP 121 .....T.....
Chr11_Peking    121 .....T.....

Ch18_Williams    181 CATTGCTACAAAAGACTAATATAAACGAGTCTGTATCTTGCTTAGACCGAGCTGTAAT
Chr18_Peking     181 .....A...T...A.....A...C.....
Chr11_Williams   181 ...A...T...A.....A...C.....
Truncated_alphaSNAP 181 ...A...T...A.....A...C.....
Chr11_Peking    181 ...A...T...A.....A...C.....

Ch18_Williams    241 CTTTTCTGTGACATTGGAAGACTCTCTATGGCTGCTAGATATTTAAAGGAAATTGCTGAA
Chr18_Peking     241 .....A.....
Chr11_Williams   241 .....A.....
Truncated_alphaSNAP 241 .....A.....
Chr11_Peking    241 .....A.....

Ch18_Williams    301 TTGTACGAGGGTGAACAGAATATTGAGCAGGCTCTTGTACTATGAAAAATCAGCTGAT
Chr18_Peking     301 .....T.....
Chr11_Williams   301 .....T.....
Truncated_alphaSNAP 301 .....T.....
Chr11_Peking    301 .....T.....

Ch18_Williams    361 TTTTTTCAAAATGAAGAAGTGACAACCTTCTGCGAACCAATGCAAACAAAAGTTGCCAG
Chr18_Peking     361 .....A.....
Chr11_Williams   361 .....A.....
Truncated_alphaSNAP 361 .....A.....
Chr11_Peking    361 .....A.....

Ch18_Williams    421 TTTGCTGCTCAGCTAGAACAATATCAGAAGTCGATTGACATTTATGAAGAGATAGCTCGC
Chr18_Peking     421 .....G...C.....
Chr11_Williams   421 .....G...C.....
Truncated_alphaSNAP 421 .....G...C.....
Chr11_Peking    421 .....G...C.....

Ch18_Williams    481 CAATCCCTCAACAATAATTGCTGAAGTATGGAGTTAAAGGACACCTTCTTAATGCTGGC
Chr18_Peking     481 .....G.....
Chr11_Williams   481 .....G.....
Truncated_alphaSNAP 481 .....G.....
Chr11_Peking    481 .....G.....

Ch18_Williams    541 ATCTGCCAACTCTGTAAGAGGACGTTGTTGCTATAACCAATGCATTAGAACGATATCAG
Chr18_Peking     541 .....G...T...A...G.....
Chr11_Williams   541 .....G...T...A...G.....
Truncated_alphaSNAP 541 .....G...T...A...G.....
Chr11_Peking    541 .....G...T...A...G.....

Ch18_Williams    601 GAACTGGATCCAACATTTTCAGGAACACGTAATATAGATTGTTGGCGGACATTGCTGCT
Chr18_Peking     601 .....T.....
Chr11_Williams   601 .....T.....
Truncated_alphaSNAP 601 .....T.....TTAGG.CACTAG
Chr11_Peking    601 .....T.....TTAGG.CACTAG

Ch18_Williams    661 GC
Chr18_Peking     661 ..
Chr11_Williams   661 ..
Truncated_alphaSNAP --
Chr11_Peking    --

```

**Figure S1. Previously reported truncated allele of -SNAP shares higher sequence similarity to the paralog encoded on chromosome 11 and is likely not encoded by *Glyma18g02590* at *Rhg1*.**

Nucleic acid alignment for the first 661 bases of -SNAP encoded by chromosome 18 (*Rhg1*) and 11 (paralog) from Williams82 and Peking, and the previously reported truncated allele

*Figure S1 cont'd*

sequence in Matsye et al. (2012). Sequence from Williams82 is shown and positions with an identical sequence are listed as (.). The sequence reported in Matsye et al. (2012) for the truncated allele of *Glyma18g02590* is most similar to the Williams 82 and Peking paralogs encoded on chromosome 11. The polymorphism reported to change the exon-intron boundary and cause the splice variant is highlighted in yellow, and the resulting in frame stop codon is highlighted in red.

Figure S2

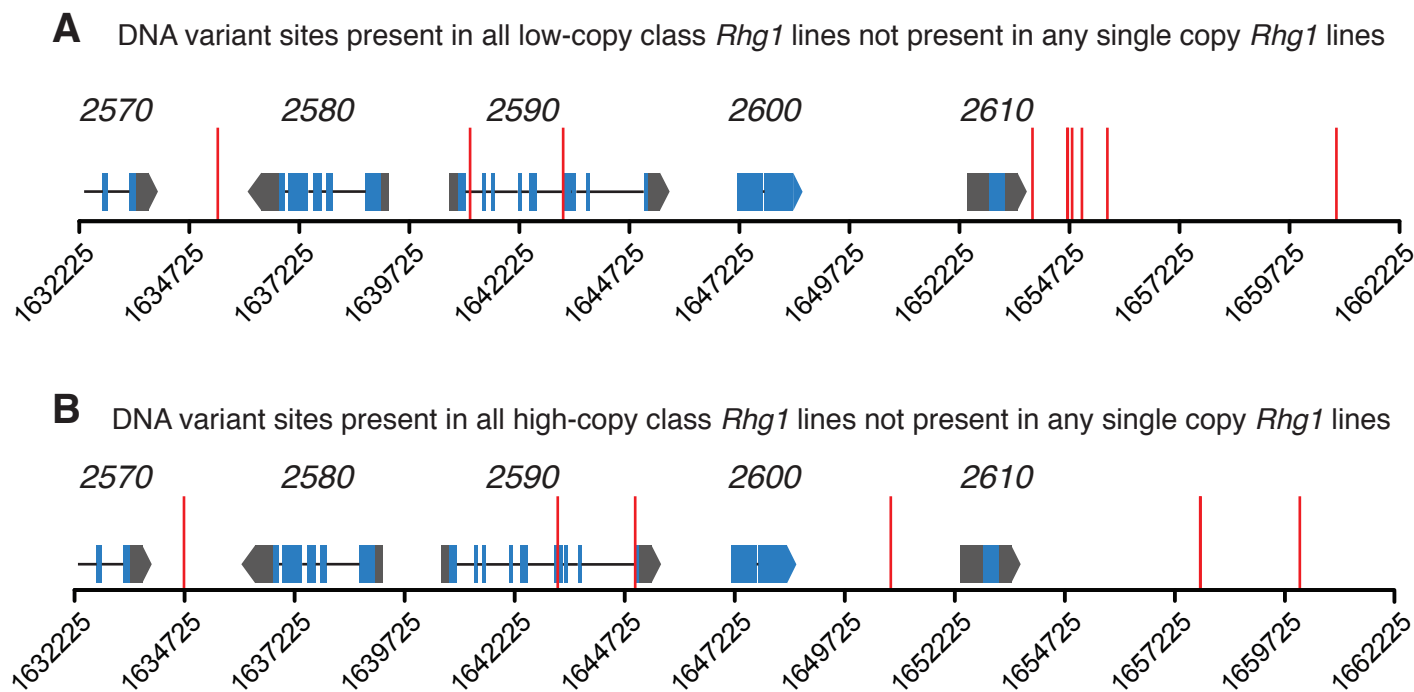

**Figure S2. The DNA sequence of *Rhg1* repeats has continued to diverge between the low- and high-copy containing lines.**

(A) DNA variant sites present in low-copy *Rhg1* Hg Type Test lines indicate that following divergence from the high-copy group, the locus is continuing to evolve. There are 10 DNA variants present in all low-copy *Rhg1* lines, not present in the high-copy or single-copy lines. (B) DNA variant sites are shown as in (A), but instead only DNA variant sites present in high-copy Hg Type Test lines, not present in low-copy or single-copy lines. Red vertical bars represent the location of the DNA variants across the *Rhg1* locus. *Rhg1* locus gene models shown at correct x-axis position for reference (blue exons, black line introns, grey untranslated regions); gene name is above gene model (e.g., 2570 = *Glyma18g02570*).

Figure S3

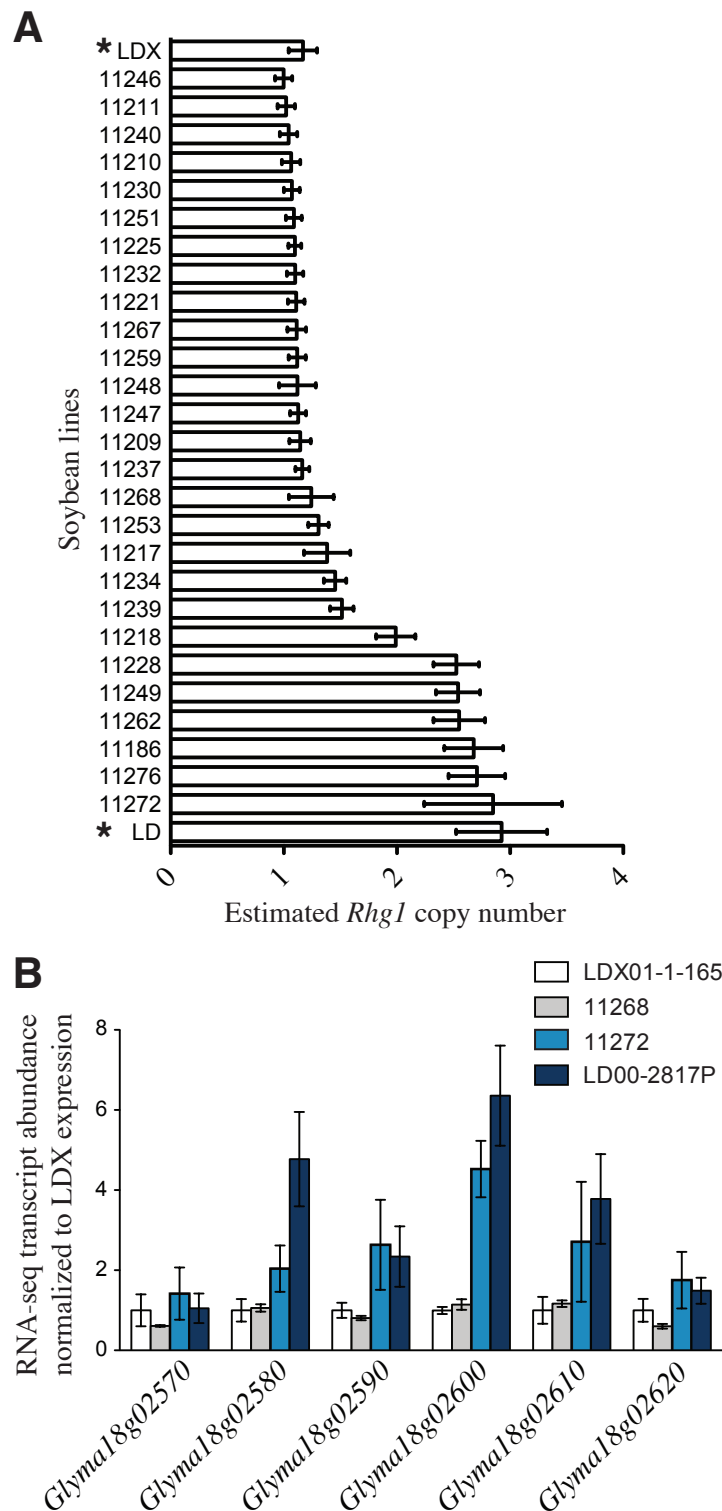

**Figure S3. Copy number estimates and RNA-seq analysis indicate the presence of multiple copies of *Rhg1* in SCN resistant parent LD00-2871P and some progeny with a concomitant increase in transcription.**

(A) Parental lines and 27 progeny were analyzed for *Rhg1* copy number estimates based on cytosine sequencing depth. The parental line LD00-2871P (LD) is estimated to contain 3 copies of the *Rhg1* repeat, consistent with its derivation of SCN resistance from PI 437654 described here. The two parental lines are denoted with \*. (B) Relative transcript abundance based on RNA-seq reads indicates the 4 genes transcribed within the *Rhg1* repeat are expressed more highly in the parental line LD and progeny 11272 than in line LDX or 11268. These results are consistent with the *Rhg1* copy number estimates. RNA-sequencing is reported in reads per kilobase per million reads and normalized to expression from line LDX01-1-165.

Figure S4

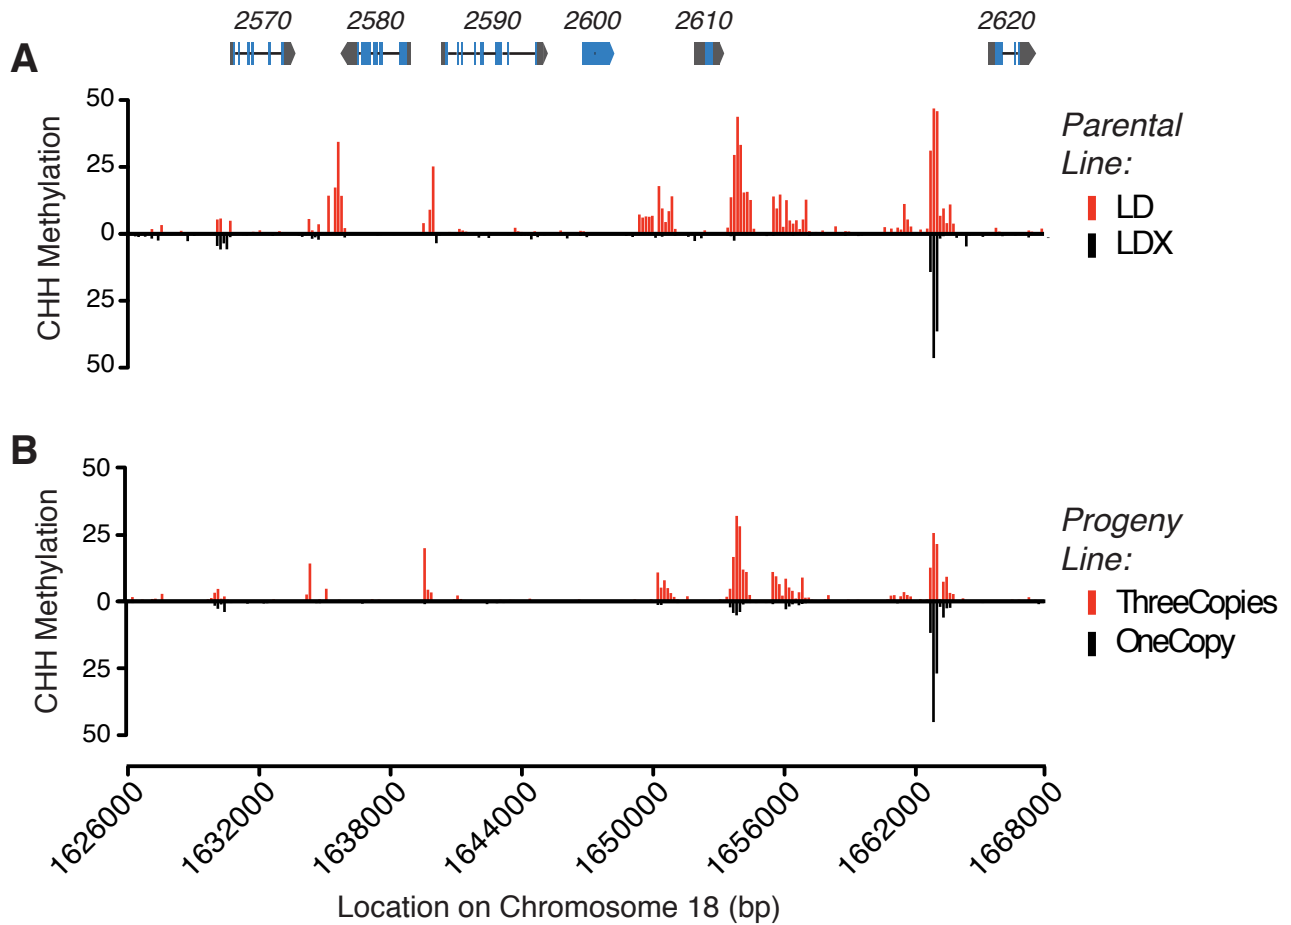

**Figure S4. DNA methylome sequence in the CHH context from three-copy and single-copy *Rhg1* lines further support differential methylation at *Rhg1* SCN resistance genes.**

Levels of DNA methylation reported as proportion of methylated cytosines detected from bisulfite sequencing. Data are for 150bp bins represented by a single vertical line. *Rhg1* locus gene models are shown at the top of panel (A) at correct x-axis position along chromosome 18 shown below panel (B) for reference (blue exons, black line introns, grey untranslated regions); gene name above gene model (e.g., 2570 = *Glyma18g02570*). (A) Levels of cytosine methylation for the sequence context CHH, showing differential methylation of parental line LD (three-copies of *Rhg1*, red vertical lines above x-axis) relative to parental line LDX (single copy of *Rhg1*, black vertical lines below x-axis). The greatest differential methylation is present up and downstream of the *Glyma18g02580* open read frame (ORF), in the common promoter for *Glyma18g02580* and *Glyma18g02590*, and both up and downstream of the *Glyma18g02610* ORF, with more methylation in the three-copy *Rhg1* SCN-resistant line. (B) Average CHH methylation in F3-derived progeny families of the cross between lines LD and LDX, either for all six progeny estimated to have an *Rhg1* copy number of 3 (red vertical lines above x-axis), or for all 16 progeny lines estimated to have an *Rhg1* copy number of 1 (black vertical lines below x-axis). Substantial similarities to the parental CHH methylation patterns are evident.

Figure S5

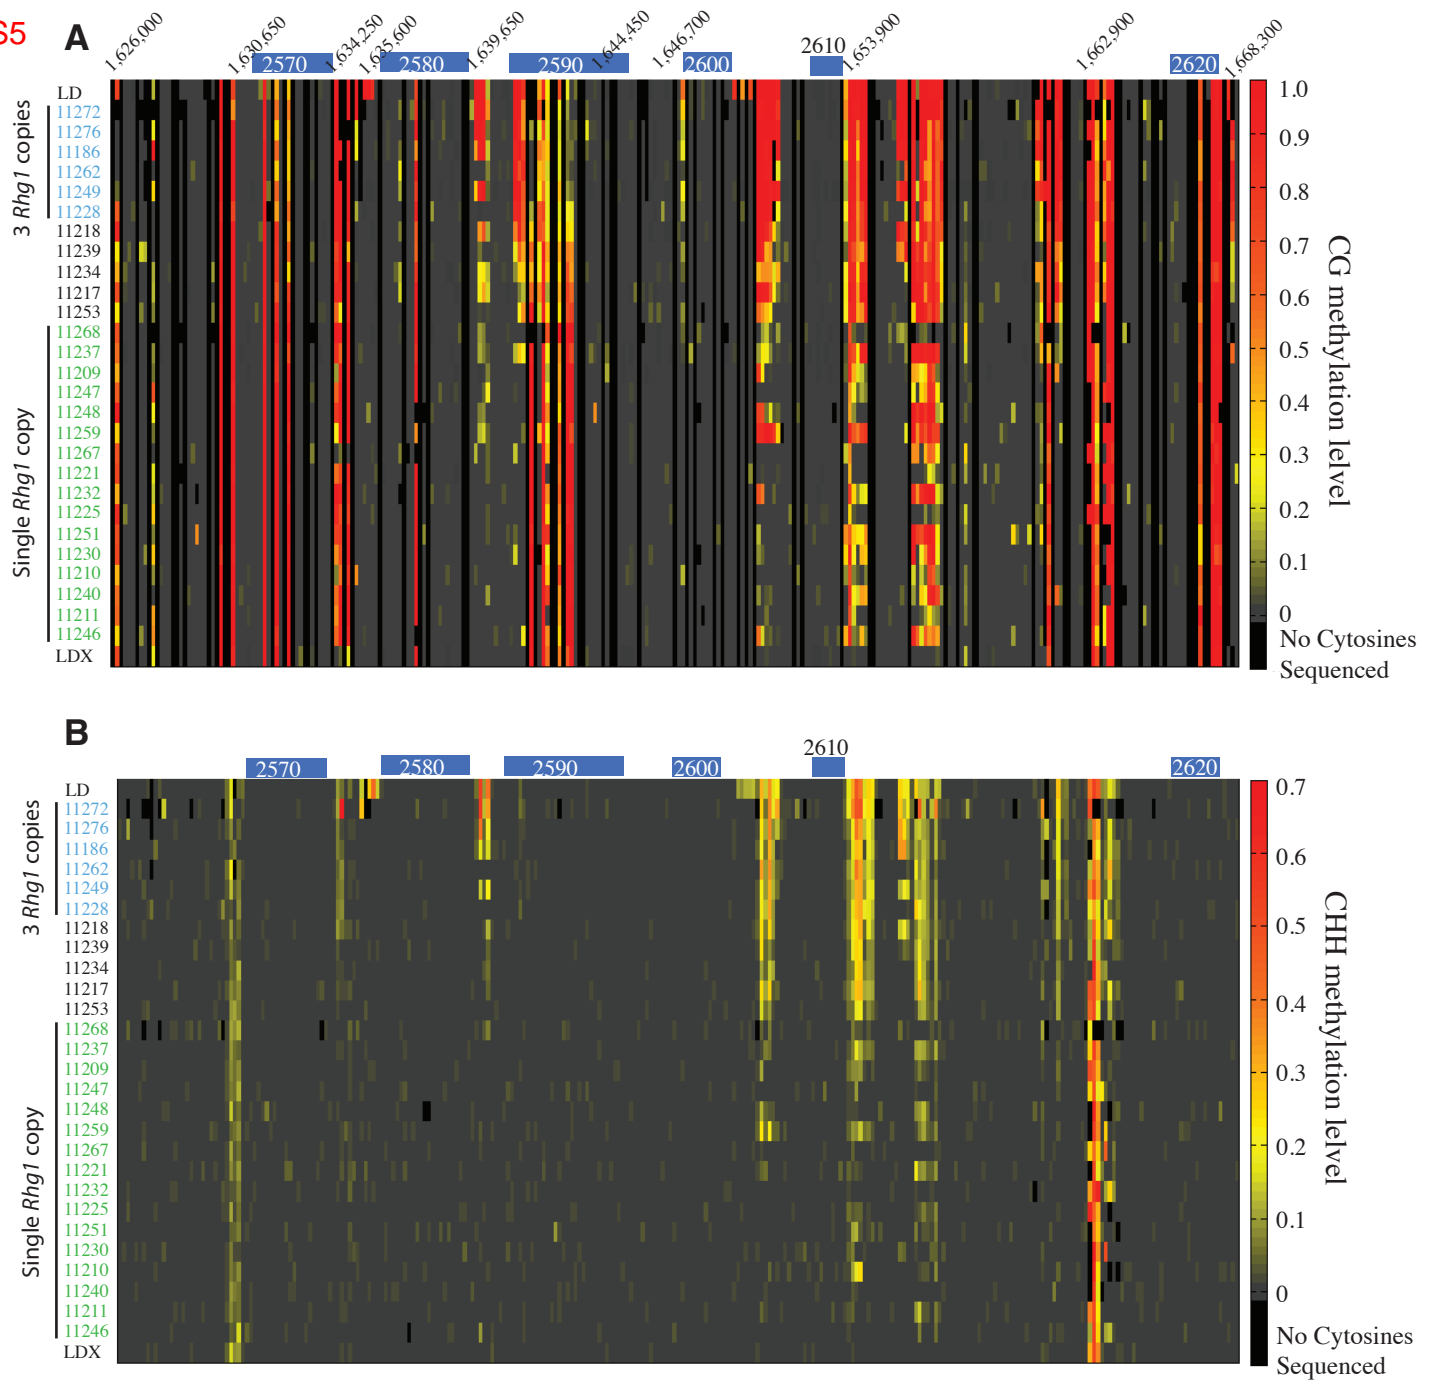

**Figure S5. Soybean lines estimated to contain 3 copies of *Rhg1* display high levels of cytosine methylation in regulatory regions of genes shown to impact SCN resistance.**

A heatmap depicting cytosine methylation levels in 150bp bins at *Rhg1* shows high levels of (A) CG methylation in line LD, estimated to contain 3 copies of *Rhg1*, relative to line LDX, estimated to contain a single copy of *Rhg1*. Their progeny were also assayed for cytosine methylation and progeny estimated to contain 3 copies of *Rhg1* (shown in blue) have a similarly high level of CG methylation compared to single copy progeny (shown in green). The progeny were selected in the F3 generation and likely contain lines with heterozygous *Rhg1* loci (shown in black). (B) Cytosine methylation was analyzed as in (A) but in the sequence context of CHH, where H is any nucleotide A, T, or C. Chromosome positions are shown for reference. Bins that did not have cytosine sequence data, either because of low coverage or because no cytosine exist in that sequence context within the bin, are shown as black. Gene models above each graph are shown in scale to chromosome 18 for reference.

**Table S1. Summary statistics for SoyNAM whole genome sequencing**

| <b>Genotype</b> | <b>Sequence (Mb)</b> | <b>Average Coverage</b> | <b>Reads</b> | <b>Quality Score</b> | <b>Read Length (bp)</b> |
|-----------------|----------------------|-------------------------|--------------|----------------------|-------------------------|
| LD00-3309       | 12,443               | 13.1                    | 82,405,208   | 34.3                 | 151                     |
| LG05-4292       | 11,725               | 12.3                    | 77,646,454   | 31.05                | 151                     |
| 4J105-3-4       | 12,112               | 12.7                    | 80,213,570   | 32.9                 | 151                     |
| CLOJ095-4-6     | 9,641                | 10.1                    | 63,847,612   | 32.58                | 151                     |
| LD02-4485       | 7,565                | 8.0                     | 50,099,482   | 34.48                | 151                     |
| LD02-9050       | 6,191                | 6.5                     | 40,999,452   | 34.19                | 151                     |
| Maverick        | 5,750                | 6.1                     | 38,077,200   | 34.67                | 151                     |
| LD01-5907       | 5,915                | 6.2                     | 39,174,146   | 31.51                | 151                     |
| LG05-4317       | 9,464                | 10.0                    | 62,678,462   | 30.94                | 151                     |
| NE3001          | 8,535                | 9.0                     | 56,524,252   | 34.51                | 151                     |
| PI518_751       | 14,566               | 15.3                    | 96,464,146   | 31.88                | 151                     |
| LG92-1255       | 9,227                | 9.7                     | 61,105,816   | 31.78                | 151                     |
| LG94-1128       | 6,025                | 6.3                     | 39,903,618   | 31.93                | 151                     |
| LG94-1906       | 8,126                | 8.6                     | 53,811,902   | 32.95                | 151                     |
| CLOJ173-6-8     | 6,375                | 6.7                     | 42,218,296   | 32.53                | 151                     |
| HS6-3976        | 9,026                | 9.5                     | 59,774,700   | 32.4                 | 151                     |
| LG03-3191       | 11,802               | 12.4                    | 78,160,256   | 31.49                | 151                     |
| LG04-4717       | 9,997                | 10.5                    | 66,208,394   | 31.23                | 151                     |
| PI398_881       | 10,717               | 11.3                    | 70,971,440   | 29.14                | 151                     |
| PI427_136       | 13,702               | 14.4                    | 90,738,654   | 28.98                | 151                     |
| PI507_681B      | 11,330               | 11.9                    | 75,029,874   | 29.56                | 151                     |
| LG90-2550       | 5,441                | 5.7                     | 36,035,936   | 31.5                 | 151                     |
| Prohio          | 10,322               | 10.9                    | 68,354,318   | 32.39                | 151                     |
| LG98-1605       | 5,344                | 5.6                     | 35,391,702   | 32.82                | 151                     |

Data are listed for each genotype and summarized as the total amount of sequence generated in megabases (Mb). Average Coverage is the genome wide average sequence coverage. Reads corresponds to the number of reads generated and the Quality Score is the average Phred based quality score for the total reads. All sequences were generated from a short insert library with paired-end sequencing of 151 bases.

**Table S2. Summary statistics for Hg-Type Test whole genome sequencing**

| <b>Genotype</b> | <b>Sequencing Library</b> | <b>Sequence (Mb)</b> | <b>Average Coverage</b> | <b>Reads</b> | <b>Quality Score</b> | <b>Read Length (bp)</b> |
|-----------------|---------------------------|----------------------|-------------------------|--------------|----------------------|-------------------------|
| Cloud           | Paired-end                | 11,860               | 12.5                    | 117,426,128  | 34.98                | 101                     |
|                 | Mate-pair                 | 1,944                | 2.0                     | 19,252,220   | 34.12                | 101                     |
| PI 209332       | Paired-end                | 14,314               | 15.1                    | 141,724,130  | 35.16                | 101                     |
|                 | Mate-pair                 | 2,994                | 3.2                     | 29,642,412   | 33.93                | 101                     |
| PI 437654       | Paired-end                | 17,519               | 18.4                    | 173,457,140  | 35.48                | 101                     |
|                 | Mate-pair                 | 6,205                | 6.5                     | 61,433,454   | 34.07                | 101                     |
| Peking          | Paired-end                | 45,670               | 48.1                    | 452,180,560  | 35.65                | 101                     |
|                 | Mate-pair                 | 1,756                | 1.8                     | 17,390,516   | 34.71                | 101                     |
| PI 89772        | Paired-end                | 12,894               | 13.6                    | 127,662,706  | 35.23                | 101                     |
|                 | Mate-pair                 | 4,247                | 4.5                     | 42,049,176   | 33.86                | 101                     |
| PI 90763        | Paired-end                | 17,043               | 17.9                    | 168,742,468  | 35.46                | 101                     |
|                 | Mate-pair                 | 3,002                | 3.2                     | 29,720,314   | 34.15                | 101                     |

Data are listed for each genotype, separated into the sequencing for each library type. The total amount of sequence generated in megabases (Mb) and Average Coverage are presented genome wide. Reads corresponds to the number of reads generated and Quality Score is the average Phred based quality score for the total reads. All sequences had a read length of 101 bases.



**Table S3. Estimated *Rhg1* copy number for SoyNAM lines using rapid mapping**

| <b>Genotype</b> | <b>Copy Number Estimates</b>           |                                    |
|-----------------|----------------------------------------|------------------------------------|
|                 | <b>Chromosome 18<br/>(<i>Rhg1</i>)</b> | <b>Chromosome 11<br/>(paralog)</b> |
| 4J105-34        | 9.9 ± 1.9                              | 1.0 ± 0.2                          |
| LD00-3309       | 9.9 ± 1.8                              | 0.9 ± 0.2                          |
| LD02-4485       | 9.8 ± 2.2                              | 1.0 ± 0.3                          |
| CL0J095-46      | 9.6 ± 1.5                              | 0.9 ± 0.2                          |
| LD02-9050       | 9.4 ± 3.4                              | 1.0 ± 0.4                          |
| LG05-4292       | 9.4 ± 1.7                              | 1.0 ± 0.2                          |
| Maverick        | 9.2 ± 3.3                              | 0.9 ± 0.3                          |
| LD01-5907       | 2.9 ± 0.9                              | 1.1 ± 0.3                          |
| PI574486        | 1.3 ± 0.2                              |                                    |
| LG05-4317       | 1.3 ± 0.2                              |                                    |
| LG97-7012       | 1.2 ± 0.1                              |                                    |
| LG04-4717       | 1.1 ± 0.6                              |                                    |
| LG98-1605       | 1.1 ± 0.4                              |                                    |
| PI427136        | 1.1 ± 0.3                              |                                    |
| PI404188A       | 1.1 ± 0.3                              |                                    |
| LG90-2550       | 1.1 ± 0.3                              |                                    |
| U03-100612      | 1.1 ± 0.2                              |                                    |
| PI398881        | 1.1 ± 0.2                              |                                    |
| 5M20-252        | 1.1 ± 0.2                              |                                    |
| S06-13640       | 1.1 ± 0.2                              |                                    |
| LG05-4832       | 1.1 ± 0.1                              |                                    |
| LG94-1906       | 1.1 ± 0.1                              |                                    |
| CL0J173-68      | 1.1 ± 0.1                              |                                    |
| LG94-1128       | 1.1 ± 0.1                              |                                    |
| PI518751        | 1.0 ± 0.3                              |                                    |
| LG92-1255       | 1.0 ± 0.3                              |                                    |
| HS6-3976        | 1.0 ± 0.3                              |                                    |
| Prohio          | 1.0 ± 0.2                              |                                    |
| PI561370        | 1.0 ± 0.2                              |                                    |
| PI507681B       | 1.0 ± 0.2                              |                                    |
| LG03-3191       | 1.0 ± 0.2                              |                                    |
| LG03-2979       | 1.0 ± 0.2                              |                                    |
| IA3023          | 1.0 ± 0.2                              |                                    |
| NE3001          | 0.9 ± 0.3                              |                                    |
| LG05-4464       | 0.9 ± 0.2                              |                                    |

Short reads from whole genome sequencing were aligned to a portion of the reference genome to rapidly estimate *Rhg1* copy number (chromosome 18), results are listed by

*Table S3 cont'd*

genotype. Copy number was estimated by summing the total number of reads in three equally sized DNA intervals spanning the *Rhg1* repeat, and the 5' and 3' adjacent intervals. The total number of reads from the *Rhg1* interval was independently divided by the total number of reads from the two adjacent intervals to estimate copy number. The reported copy number is the average of the two estimates along with the standard error of the mean. Similar analysis was performed for the paralogous sequence on chromosome 11, and did not significantly deviate from a single copy.

**Table S4. Sequenced cDNA products confirms the expression of multiple alleles of *Glyma18g02590* in the different multi-copy *Rhg1* classes**

| <b>Genotype</b> | <b>Identified Allele</b> | <b>Sequenced cDNA products</b> |
|-----------------|--------------------------|--------------------------------|
| PI 88788        | High copy allele         | 26                             |
|                 | Low copy allele          | 0                              |
|                 | Splice isoform           | 0                              |
|                 | Williams-type            | 2                              |
| PI 209332       | High copy allele         | 8                              |
|                 | Low copy allele          | 0                              |
|                 | Splice isoform           | 0                              |
|                 | Williams-type            | 0                              |
| Cloud           | High copy allele         | 7                              |
|                 | Low copy allele          | 0                              |
|                 | Splice isoform           | 0                              |
|                 | Williams-type            | 1                              |
| Peking          | High copy allele         | 0                              |
|                 | Low copy allele          | 8                              |
|                 | Splice isoform           | 1                              |
|                 | Williams-type            | 0                              |
| PI 90763        | High copy allele         | 0                              |
|                 | Low copy allele          | 6                              |
|                 | Splice isoform           | 3                              |
|                 | Williams-type            | 0                              |
| PI 89772        | High copy allele         | 0                              |
|                 | Low copy allele          | 6                              |
|                 | Splice isoform           | 1                              |
|                 | Williams-type            | 0                              |
| PI 437654       | High copy allele         | 0                              |
|                 | Low copy allele          | 8                              |
|                 | Splice isoform           | 3                              |
|                 | Williams-type            | 0                              |
| Williams 82     | High copy allele         | 0                              |
|                 | Low copy allele          | 0                              |
|                 | Splice isoform           | 0                              |
|                 | Williams-type            | 6                              |

Products from cloning cDNA products are listed by genotype. The identified allele corresponds to different alleles of *Glyma18g02590* from the Hg Type Test lines and Williams 82. A zero indicates the transcript was not observed. A splice isoform was detected in all low-copy genomes not detected in Williams 82 or the high-copy genomes.

**Table S5. Amino acid polymorphisms for *Rhg1* paralogous genes encoded on chromosome 11.**

| <b>Position (bp)</b>                               | <b>Peking</b> | <b>PI<br/>90763</b> | <b>PI<br/>89772</b> | <b>PI<br/>437654</b> | <b>LD01-<br/>5907</b> | <b>Cloud</b> | <b>LG05-<br/>4292</b> | <b>Maverick</b> |
|----------------------------------------------------|---------------|---------------------|---------------------|----------------------|-----------------------|--------------|-----------------------|-----------------|
| <b><i>Glyma11g35840</i></b><br>(Gm18.2570.Paralog) |               |                     |                     |                      |                       |              |                       |                 |
| <b><i>Glyma11g35830</i></b><br>(Gm18.2580.Paralog) |               |                     |                     |                      |                       |              |                       |                 |
| <b><i>Glyma11g35820</i></b><br>(Gm18.2590.Paralog) |               |                     |                     |                      |                       |              |                       |                 |
| 37418427                                           | Isoform       | Isoform             | Isoform             | Isoform              | Isoform               | Isoform      | Isoform               | Isoform         |
| 37418685                                           | A179T         | A179T               | A179T               | A179T                | A179T                 | A179T        | A179T                 |                 |
| <b><i>Glyma11g35810</i></b><br>(Gm18.2600.Paralog) |               |                     |                     |                      |                       |              |                       |                 |
| 37413493                                           | R320Q         | R320Q               | R320Q               | R320Q                | R320Q                 | R320Q        | R320Q                 | R320Q           |
| 37413566                                           | A296T         | A296T               | A296T               | A296T                | A296T                 | A296T        | A296T                 | A296T           |
| <b><i>Glyma11g35800</i></b><br>(Gm18.2610.Paralog) |               |                     |                     |                      |                       |              |                       |                 |
| <b><i>Glyma11g35790</i></b><br>(Gm18.2620.Paralog) |               |                     |                     |                      |                       |              |                       |                 |

Position : Chromosome 11 base-pair position relative to Williams 82 reference genome, with gene name (and chromosome18 paralog) above relevant bp positions. Of the six genes analyzed, four did not contain polymorphisms relative to Williams 82 as indicated. Isoform: An mRNA splice isoform predicted to be caused by a SNP as reported (Matsye et al., 2012). Amino acid polymorphisms are reported as the amino acid present in Williams 82, the amino acid position, and the resulting new amino acid discovered. Genotypes not listed did not show polymorphic amino acid sequence for the genes analyzed.

**Table S6. Sequence frequencies at DNA variant positions across the *Rhg1* repeat indicates varying sequence content between copies.**

| Position | Genotypes |           |       | Average Frequency |
|----------|-----------|-----------|-------|-------------------|
|          | LD00-3309 | PI 209332 | Cloud |                   |
| 1633532  | 1.00      | 1.00      | 1.00  | 1.00              |
| 1633629  | 1.00      | 1.00      | 1.00  | 1.00              |
| 1633700  | 1.00      | 1.00      | 1.00  | 1.00              |
| 1633840  | 1.00      | 0.99      | 1.00  | 1.00              |
| 1633930  | 1.00      | 1.00      | 1.00  | 1.00              |
| 1634533  | 1.00      | 0.90      | 1.00  | 0.97              |
| 1634534  | 1.00      | 0.92      | 1.00  | 0.97              |
| 1634535  | 1.00      | 0.92      | 1.00  | 0.97              |
| 1634536  | 1.00      | 0.92      | 1.00  | 0.97              |
| 1634610  | 1.00      | 1.00      | 1.00  | 1.00              |
| 1634620  | 1.00      | 1.00      | 1.00  | 1.00              |
| 1634626  | 1.00      | 1.00      | 1.00  | 1.00              |
| 1634635  | 1.00      | 1.00      | 1.00  | 1.00              |
| 1634643  | 1.00      | 1.00      | 1.00  | 1.00              |
| 1634714  | 1.00      | 1.00      | 1.00  | 1.00              |
| 1634856  | 1.00      | 1.00      | 1.00  | 1.00              |
| 1635001  | 1.00      | 1.00      | 1.00  | 1.00              |
| 1635014  | 1.00      | 1.00      | 1.00  | 1.00              |
| 1635093  | 1.00      | 1.00      | 1.00  | 1.00              |
| 1635120  | 1.00      | 1.00      | 1.00  | 1.00              |
| 1635364  | 1.00      | 1.00      | 1.00  | 1.00              |
| 1635912  | 1.00      | 1.00      | 1.00  | 1.00              |
| 1636766  | 1.00      | 1.00      | 1.00  | 1.00              |
| 1639354  | 0.96      | 0.99      | 1.00  | 0.98              |
| 1640056  | 1.00      | 1.00      | 1.00  | 1.00              |
| 1640137  | 1.00      | 1.00      | 1.00  | 1.00              |
| 1640151  | 1.00      | 1.00      | 1.00  | 1.00              |
| 1640292  | 1.00      | 1.00      | 1.00  | 1.00              |
| 1640480  | 0.92      | 0.97      | 1.00  | 0.96              |
| 1640581  | 0.88      | 0.90      | 0.81  | 0.86              |
| 1640675  | 0.86      | 0.90      | 0.75  | 0.84              |
| 1641208  | 0.88      | 0.87      | 0.88  | 0.88              |
| 1641800  | 0.89      | 0.87      | 0.88  | 0.88              |
| 1642266  | 0.79      | 0.92      | 0.81  | 0.84              |
| 1642672  | 0.91      | 0.92      | 0.84  | 0.89              |
| 1642762  | 0.94      | 0.95      | 0.91  | 0.93              |
| 1642848  | 0.87      | 0.90      | 0.81  | 0.86              |
| 1643208  | 0.91      | 0.88      | 0.87  | 0.89              |
| 1643849  | 0.89      | 0.89      | 0.87  | 0.89              |
| 1644089  | 0.91      | 0.87      | 0.83  | 0.87              |
| 1644385  | 0.90      | 0.96      | 0.90  | 0.92              |
| 1644493  | 0.88      | 0.93      | 0.88  | 0.90              |
| 1644525  | 0.89      | 0.89      | 0.84  | 0.87              |
| 1644577  | 0.85      | 0.87      | 0.84  | 0.85              |
| 1644965  | 0.85      | 0.87      | 0.81  | 0.84              |
| 1644968  | 0.84      | 0.88      | 0.81  | 0.84              |
| 1644972  | 0.87      | 0.92      | 0.87  | 0.89              |
| 1644974  | 0.84      | 0.88      | 0.83  | 0.85              |

|         |      |      |      |      |
|---------|------|------|------|------|
| 1645218 | 0.84 | 0.89 | 0.77 | 0.83 |
| 1645437 | 0.86 | 0.93 | 0.92 | 0.90 |
| 1645745 | 0.90 | 0.91 | 0.86 | 0.89 |
| 1645759 | 0.88 | 0.88 | 0.85 | 0.87 |
| 1645811 | 0.92 | 0.87 | 0.84 | 0.88 |
| 1645908 | 0.88 | 0.89 | 0.87 | 0.88 |
| 1645914 | 0.93 | 0.92 | 0.93 | 0.93 |
| 1646130 | 0.81 | 0.70 | 0.54 | 0.68 |
| 1646138 | 0.77 | 0.62 | 0.51 | 0.63 |
| 1646145 | 0.76 | 0.61 | 0.50 | 0.62 |
| 1646211 | 0.88 | 0.85 | 0.82 | 0.85 |
| 1646226 | 0.91 | 0.86 | 0.83 | 0.87 |
| 1648850 | 0.93 | 0.94 | 0.85 | 0.91 |
| 1649069 | 0.96 | 0.90 | 0.88 | 0.91 |
| 1649212 | 0.91 | 0.89 | 0.86 | 0.88 |
| 1649293 | 0.96 | 0.91 | 0.87 | 0.92 |
| 1649328 | 0.94 | 0.92 | 0.87 | 0.91 |
| 1649335 | 1.00 | 0.93 | 0.81 | 0.91 |
| 1649371 | 0.92 | 0.89 | 0.85 | 0.88 |
| 1649385 | 0.90 | 0.90 | 0.83 | 0.88 |
| 1649553 | 0.97 | 0.97 | 0.92 | 0.95 |
| 1649630 | 0.84 | 0.93 | 0.85 | 0.87 |
| 1649892 | 0.92 | 0.91 | 0.85 | 0.89 |
| 1649934 | 0.91 | 0.87 | 0.88 | 0.88 |
| 1650106 | 0.93 | 0.94 | 0.93 | 0.93 |
| 1650140 | 0.90 | 0.91 | 0.90 | 0.90 |
| 1650201 | 0.89 | 0.92 | 0.89 | 0.90 |
| 1650310 | 0.98 | 0.95 | 0.92 | 0.95 |
| 1650501 | 0.89 | 0.86 | 0.88 | 0.88 |
| 1650590 | 0.87 | 0.93 | 0.98 | 0.93 |
| 1650772 | 0.90 | 0.88 | 0.86 | 0.88 |
| 1651003 | 0.95 | 1.00 | 1.00 | 0.98 |
| 1651056 | 0.93 | 0.93 | 0.92 | 0.92 |
| 1651602 | 0.95 | 0.91 | 0.90 | 0.92 |
| 1652723 | 0.92 | 0.93 | 1.00 | 0.95 |
| 1653661 | 0.82 | 0.90 | 0.87 | 0.86 |
| 1654230 | 0.87 | 0.96 | 0.82 | 0.88 |
| 1654282 | 0.94 | 0.92 | 0.80 | 0.89 |
| 1655099 | 0.88 | 0.87 | 0.72 | 0.82 |
| 1655195 | 0.86 | 0.92 | 0.86 | 0.88 |
| 1655348 | 0.94 | 0.99 | 0.89 | 0.94 |
| 1655353 | 0.89 | 0.92 | 0.85 | 0.89 |
| 1655408 | 0.95 | 0.90 | 0.87 | 0.91 |
| 1655500 | 0.94 | 0.95 | 0.90 | 0.93 |
| 1655564 | 0.96 | 0.94 | 0.82 | 0.91 |
| 1655585 | 0.93 | 0.87 | 0.82 | 0.87 |
| 1655836 | 0.88 | 0.89 | 0.84 | 0.87 |
| 1656044 | 0.90 | 0.88 | 0.80 | 0.86 |
| 1656178 | 0.88 | 0.94 | 0.85 | 0.89 |
| 1656263 | 0.88 | 0.89 | 0.82 | 0.86 |
| 1656394 | 0.88 | 0.87 | 0.83 | 0.86 |
| 1656417 | 0.82 | 0.82 | 0.71 | 0.79 |
| 1656462 | 0.81 | 0.84 | 0.85 | 0.83 |
| 1656633 | 0.88 | 0.94 | 0.94 | 0.92 |

|         |      |      |      |      |
|---------|------|------|------|------|
| 1656719 | 0.91 | 0.97 | 0.79 | 0.89 |
| 1656769 | 0.88 | 0.91 | 0.83 | 0.87 |
| 1656898 | 0.89 | 0.91 | 0.81 | 0.87 |
| 1656979 | 0.92 | 0.95 | 0.84 | 0.90 |
| 1657025 | 0.42 | 0.54 | 0.51 | 0.49 |
| 1657162 | 0.85 | 0.91 | 0.91 | 0.89 |
| 1657183 | 0.86 | 0.93 | 0.90 | 0.90 |
| 1657307 | 0.91 | 0.86 | 0.87 | 0.88 |
| 1657506 | 0.91 | 0.88 | 0.88 | 0.89 |
| 1657803 | 0.87 | 0.88 | 0.74 | 0.83 |
| 1657807 | 0.83 | 0.76 | 0.68 | 0.76 |
| 1657815 | 0.84 | 0.76 | 0.73 | 0.78 |
| 1657816 | 0.84 | 0.74 | 0.70 | 0.76 |
| 1658170 | 0.90 | 0.93 | 0.87 | 0.90 |
| 1658284 | 0.83 | 0.91 | 0.81 | 0.85 |
| 1658617 | 0.86 | 0.88 | 0.91 | 0.88 |
| 1658735 | 0.90 | 0.91 | 0.88 | 0.90 |
| 1659502 | 0.91 | 0.95 | 0.93 | 0.93 |
| 1659777 | 0.88 | 0.92 | 0.86 | 0.89 |
| 1659829 | 0.83 | 0.89 | 0.83 | 0.85 |
| 1659914 | 0.91 | 0.88 | 0.87 | 0.89 |
| 1659945 | 0.91 | 0.83 | 0.88 | 0.87 |
| 1660067 | 0.91 | 0.88 | 0.82 | 0.87 |
| 1660183 | 0.89 | 0.91 | 0.89 | 0.90 |
| 1660790 | 1.00 | 1.00 | 1.00 | 1.00 |
| 1661155 | 1.00 | 1.00 | 1.00 | 1.00 |
| 1661264 | 0.87 | 0.72 | 0.62 | 0.74 |
| 1661293 | 0.87 | 0.78 | 0.74 | 0.80 |
| 1661406 | 0.89 | 0.92 | 0.86 | 0.89 |
| 1661428 | 0.91 | 0.90 | 0.86 | 0.89 |
| 1661460 | 0.95 | 0.93 | 0.84 | 0.91 |
| 1662031 | 0.96 | 0.91 | 0.86 | 0.91 |
| 1662115 | 1.00 | 1.00 | 1.00 | 1.00 |
| 1662177 | 0.88 | 0.87 | 0.86 | 0.87 |
| 1662656 | 0.84 | 0.94 | 0.89 | 0.89 |
| 1662666 | 0.80 | 0.91 | 0.89 | 0.87 |
| 1662682 | 0.81 | 0.93 | 0.91 | 0.88 |
| 1662714 | 0.86 | 0.95 | 0.91 | 0.91 |
| 1662734 | 1.00 | 1.00 | 1.00 | 1.00 |
| 1662810 | 0.82 | 0.85 | 0.85 | 0.84 |
| 1662851 | 1.00 | 1.00 | 1.00 | 1.00 |
| 1662946 | 0.83 | 0.83 | 0.80 | 0.82 |
| 1662953 | 0.71 | 0.83 | 0.79 | 0.78 |
| 1663007 | 0.63 | 0.90 | 0.86 | 0.80 |
| 1663014 | 0.63 | 0.90 | 0.82 | 0.78 |
| 1663032 | 0.60 | 0.90 | 0.85 | 0.79 |
| 1663064 | 0.57 | 0.90 | 0.86 | 0.78 |
| 1663114 | 0.69 | 0.94 | 0.86 | 0.83 |
| 1663133 | 0.65 | 0.92 | 0.78 | 0.78 |
| 1663148 | 0.66 | 0.92 | 0.76 | 0.78 |
| 1663225 | 1.00 | 1.00 | 1.00 | 1.00 |
| 1663250 | 0.70 | 0.94 | 0.78 | 0.81 |

*Table S6 cont'd*

Position: Base pair position on chromosome 18 of Williams 82 corresponding to a DNA variant position. The variant allele frequency is reported below each genotype as the sum of the total number of reads supporting an alternate sequence at the position, divided by the total number of sequenced reads (wild-type plus variant) at the position. Average Frequency: The average frequency at a given variant site computed from the three genomes.
